# Supplementary material for: Households' access to an improved latrine and its associated factors among households of sanitation marketing products users and non-users, Northeast Amhara, Ethiopia
Source: PubMed Central journal article supplement — Heliyon. 2022 Nov 1;8(11):e11325. doi: 10.1016/j.heliyon.2022.e11325 (PMC9647351; doi:10.1016/j.heliyon.2022.e11325), 2022-11-01
Supplement: mmc1.pdf [file mmc1.pdf]

**Questionnaire for assessment on the access of improved latrine among households of sanitation marketing products users and non-users and associated factors in Dessie Zuria, South Wollo zone Amhara region.**

| Part I (100): - Socio-demographic factors |                                                                    |                                                                                              |        |      |
|-------------------------------------------|--------------------------------------------------------------------|----------------------------------------------------------------------------------------------|--------|------|
| No                                        | Questions                                                          | Response options                                                                             | Answer | Skip |
| 101                                       | Who is the head of the household?                                  | 1. Father 2.Mother 9.Other specify---                                                        |        |      |
| 102                                       | Sex?                                                               | 1 Female 2. Male                                                                             |        |      |
| 103                                       | Age?                                                               | _____ Years                                                                                  |        |      |
| 104                                       | What is your Religion?                                             | 1.Ortodox 2.Muslim 3.Catholic<br>4.Protestant 9.Other,specify-----                           |        |      |
| 105                                       | Marital status?                                                    | 1.S ingle 2.Married 3. Widowed<br>4. Divorced                                                |        |      |
| 106                                       | What is your Occupation?<br><br>(More than one option is possible) | 1.Housewife 2.Dailylabor 3.Government employee 4. Merchant 5. Farmer 9. Other (specify)----- |        |      |
| 107                                       | What is your education level?                                      | -----                                                                                        |        |      |
| 108                                       | Do you have student in your household?                             | 0 = No 1 = Yes                                                                               |        |      |

|              |                                                                                         |                                                                                                                                  |  |                  |
|--------------|-----------------------------------------------------------------------------------------|----------------------------------------------------------------------------------------------------------------------------------|--|------------------|
| 109          | Total family size of the household?<br>(number)                                         | -----                                                                                                                            |  |                  |
| wealth index |                                                                                         |                                                                                                                                  |  |                  |
| 110          | Among the following materials, which one do you own? (more than one answer is possible) | 1.Watch 2.Sofa 3.Chair 4.Table<br>5.Bed and mattress which made from Cotton spring 6.Horse's Cart<br><br>9. If others specify... |  |                  |
| 111          | Do you have your own farm for the purpose of agriculture/cropping?                      | 0 = No                      1 = Yes                                                                                              |  |                  |
| 112          | Does your living house have dividing class?                                             | 0 = No                      1 = Yes                                                                                              |  |                  |
| 113          | From the following household animal do you have? (more than one answer is possible)     | 1. Ox/ cow 2. Horse/donkey/ mule<br><br>3.Goa t4.Sheep 5.Hen 9.If others specify...                                              |  | If yes how many? |
| 114          | Who is the owner of your living house                                                   | 1. My own    2. Rent house                                                                                                       |  |                  |
| 115          | Do you have separated bedroom?                                                          | 0 = No                      1 = Yes                                                                                              |  |                  |
| 116          | Do you have separated kitchen?                                                          | 0 = No                      1 = Yes                                                                                              |  |                  |
| 117          | From which material your house floor is made? (more than one answer is possible )       | 1. Natural ground 2. Muck/smooth by cows faces 3. Wood 4. Cement<br>9. If others list ---                                        |  |                  |
| 118          | From which material your house roof is made?                                            | 1. Grass/ leaf 2. Corrugated iron                                                                                                |  |                  |

|                                     |                                                                                 |                                                                                                                                                            |       |      |
|-------------------------------------|---------------------------------------------------------------------------------|------------------------------------------------------------------------------------------------------------------------------------------------------------|-------|------|
| 119                                 | From which material your house wall is made? (more than one answer is possible) | 1.Wood but not have mod 2. Wood with mod 3. Wood and cement 4. Blocket<br><br>9. If others list---                                                         |       |      |
| 120                                 | Do you have health insurance?                                                   | 0 = No                      1 = Yes                                                                                                                        |       |      |
| Part II (200) Environmental factors |                                                                                 |                                                                                                                                                            |       |      |
| Code                                | Questions                                                                       | Response options                                                                                                                                           |       | Skip |
| 201                                 | Is there access of water?                                                       | 0 = No                      1 = Yes                                                                                                                        | If no | 202  |
| 202                                 | If yes how long does it takes to fetch water in one round trip?                 | 1=Lessthan30minute 2=Above 30 minute                                                                                                                       |       |      |
| 203                                 | Did you get training on improved sanitation facilities?                         | 0 = No                      1 = Yes                                                                                                                        |       |      |
| 204                                 | If yes who provides the training?                                               | 1= Health development army<br><br>2= Health extension worker<br><br>3= Kebele administrators<br><br>4= Woreda health officer<br><br>9= Other, specify----- |       |      |
| 205                                 | Is there a supportive supervision in the area?                                  | 0 = No                      1 = Yes                                                                                                                        |       |      |
| 206                                 | Did you get a supportive supervision?                                           | 0 = No                      1 = Yes                                                                                                                        |       |      |
| 207                                 | By whom a supportive supervision was done?                                      | 1= Health development army                                                                                                                                 |       |      |

|     |                                                                        |                                                                                                                                                                   |  |  |
|-----|------------------------------------------------------------------------|-------------------------------------------------------------------------------------------------------------------------------------------------------------------|--|--|
|     |                                                                        | <p>2= Health extension worker</p> <p>3= Kebele administrators</p> <p>4= Woreda health officer</p> <p>9= Other, specify-----</p>                                   |  |  |
| 208 | Frequency of supportive supervision                                    | <p>1= Weekly2= Monthly3= Quarterly4= yearly 9= Other, specify---</p>                                                                                              |  |  |
| 209 | Is there any external influence to buy improved sanitation facilities? | <p>0 = No                      1 = Yes</p>                                                                                                                        |  |  |
| 210 | If yes who influences you to construct latrine                         | <p>1= Health development army</p> <p>2= Health extension worker</p> <p>3= Kebele administrators</p> <p>4= Woreda health officer</p> <p>9= Other, specify-----</p> |  |  |
| 211 | Distance of the house from health post                                 | <p>1= &lt;1km 2= from 1km to 5km 3= &gt;5km</p>                                                                                                                   |  |  |
| 212 | Is there sanitation hardware stores in your community?                 | <p>0 = No                      1 = Yes</p>                                                                                                                        |  |  |
| 213 | Who recruit the store?                                                 | <p>1) NGO 2)woreda health office 3) local administrator</p>                                                                                                       |  |  |
| 213 | Which type of sanitation hardware were available in your community?    | <p>1 = satopan 2 = ducasato3 = sil Africa</p> <p>9 = others specify ---</p>                                                                                       |  |  |

|                                   |                                                                                                               |                                                                             |        |      |
|-----------------------------------|---------------------------------------------------------------------------------------------------------------|-----------------------------------------------------------------------------|--------|------|
| 214                               | Did the government or other funding agency provide any subsidy / money to help you to construct your latrine? | 0 = No                      1 = Yes                                         |        |      |
| 215                               | Is there locally available material that is used for latrine construction?                                    | 0 = No                      1 = Yes                                         |        |      |
| 216                               | If yes Which materials are available in your area?                                                            | 1= Wood 2= Wood mud      3= Grass<br>4= Stone 5= Water 9= Other specify---- |        |      |
| 217                               | Your neighbor hood have improved latrine facilities constructed?                                              | 0 = No                      1 = Yes                                         |        |      |
| 218                               | Your kebele is adjacent to sanitation market implementer kebele?                                              | 0 = No      1 = Yes      2 = I don't know                                   |        |      |
| 219                               | Distance of the house from the town?                                                                          | 1= less than 10 km 2= 10-20 km<br>3= 20-30 km 4= above 30 km                |        |      |
| 220                               | Is there a skilled mason when you want to construct improved sanitation facilities?                           | 0 = No                      1 = Yes                                         |        |      |
| 221                               | Is there a flood problem to the latrine?                                                                      | 0 = No                      1 = Yes                                         |        |      |
| 222                               | Is there a site for latrine pit or septic tank?                                                               | 0 = No                      1 = Yes                                         |        |      |
| 223                               |                                                                                                               |                                                                             |        |      |
| Part III (300) Behavioral factors |                                                                                                               |                                                                             |        |      |
| Code                              | Questions                                                                                                     | Response options                                                            | Answer | Skip |

|     |                                                                               |                                                                                                                                     |  |  |
|-----|-------------------------------------------------------------------------------|-------------------------------------------------------------------------------------------------------------------------------------|--|--|
| 301 | Promotion on improved sanitation facilities was carried out in the community? | 0 = No                      1 = Yes                                                                                                 |  |  |
| 302 | Who was provide the promotion?                                                | 1) volunteers 2) health development army 3) health extension worker 4) others                                                       |  |  |
| 303 | Have you source of information on improved sanitation facilities?             | 0 = No                      1 = Yes                                                                                                 |  |  |
| 304 | If yes who provide the information?                                           | 1= Health development army<br>2= Health extension worker<br>3= Kebele administrators<br>9= Other (specify)-----                     |  |  |
| 305 | Who is responsible for constructing latrines in your household?               | 1= Women 2= Men 3= Both                                                                                                             |  |  |
| 306 | What reason motivating you to build this latrine?                             | 1=Privacy 2=Convenience<br>3= Safety from insect and snake bites<br>4= Security for women and children<br>9= if other, specify----- |  |  |

|     |                                                                                         |                                     |  |  |
|-----|-----------------------------------------------------------------------------------------|-------------------------------------|--|--|
| 307 | Do you think that carried out of promotion is necessary for access to improved latrine? | 0 = No                      1 = Yes |  |  |
| 308 | Do you think that provision of trainng for mason, latrine stakeholder and               | 0 = No                      1 = Yes |  |  |

|     |                                                                                                                          |                                                                              |         |  |
|-----|--------------------------------------------------------------------------------------------------------------------------|------------------------------------------------------------------------------|---------|--|
|     | others are necessary for access to improved latrine?                                                                     |                                                                              |         |  |
| 309 | Do you think that availability of volunteers is necessary for access to improved latrine?                                | 0 = No                                                                       | 1 = Yes |  |
| 310 | Do you think that availability of stores for improved sanitation facilities is necessary for access to improved latrine? | 0 = No                                                                       | 1 = Yes |  |
| 311 | Do you think that creation of chains to micro finance is necessary for access to improved latrine?                       | 0 = No                                                                       | 1 = Yes |  |
| 312 | Do you think that children's feces are harmful                                                                           | 0 = No                                                                       | 1 = Yes |  |
|     |                                                                                                                          | 2 = don't know                                                               |         |  |
| 313 | Do you think that defecation in the open can speed disease in a community                                                | 0 = No                                                                       | 1 = Yes |  |
|     |                                                                                                                          | 2 = don't know                                                               |         |  |
| 314 | Do you think that can children under five die from diarrhea                                                              | 0 = No                                                                       | 1 = Yes |  |
|     |                                                                                                                          | 2 = don't know                                                               |         |  |
| 315 | Do you think that availability of water and soap near to latrine is necessary?                                           | 0 = No                                                                       | 1 = Yes |  |
| 316 | Have you ever heard about improved latrine?                                                                              | 0 = No                                                                       | 1 = Yes |  |
| 317 | What is the benefit of improved latrine? (more than one answer is possible)                                              | 1= Reduce flies 2= Reduction of bad smell 3= Prevention of disease4= Privacy |         |  |

|     |                                                                                              |                                                                                                                                                               |  |  |
|-----|----------------------------------------------------------------------------------------------|---------------------------------------------------------------------------------------------------------------------------------------------------------------|--|--|
|     |                                                                                              | 5= for open defecation free 9= I don't know                                                                                                                   |  |  |
| 318 | How can diarrhea be prevented in your household? (more than one answer is possible)          | 1= Treating/boiling water<br>2=Boiling water<br>3= Washing hands with soap<br>4= Defecating in a latrine<br>5= I don't know<br>9= If other specify-----       |  |  |
| 313 | Do you know the presence of different types of improved latrine?                             | 0 = No<br>1 = Yes                                                                                                                                             |  |  |
| 314 | What type of improved latrine do you know?                                                   | 1=Flush or pour flush to sewer system, septic tank and pit latrine<br>2= ventilated improved pit latrine<br>3= Pit latrine with slab<br>4= Composting latrine |  |  |
| 315 | When extra money is available in your household, how is this usually spent?                  | 1= Building improving latrine<br>2=Buying land 3=Buying house 4=Buying agricultural inputs 9= If Other specify---                                             |  |  |
| 316 | How satisfied are you with the availability of sanitation hardware stores in your community? | 1=Strongly satisfied 2=Moderately satisfied 3 = Moderately dissatisfied<br>4 = Strongly dissatisfied 5= Don't know                                            |  |  |
| 317 | Latrine materials can be difficult to find                                                   | 1= Strongly agree 2= Moderately agree                                                                                                                         |  |  |



|     |                                                                                     |                                                                                                      |  |  |
|-----|-------------------------------------------------------------------------------------|------------------------------------------------------------------------------------------------------|--|--|
|     |                                                                                     | 3=Moderately disagree 4=Strongly disagree 5= Don't know                                              |  |  |
| 318 | Local masons are skilled to build all kinds of latrines                             | 1= Strongly agree 2= Moderately agree<br>3 = Moderately disagree 4 = Strongly disagree 5= Don't know |  |  |
| 319 | Improved latrine prevent transmission of communicable disease?                      | 1= Strongly agree 2= Moderately agree<br>3 = Moderately disagree 4 = Strongly disagree 5= Don't know |  |  |
| 320 | People in your family know how to build improved latrine                            | 1= Strongly agree 2= Moderately agree<br>3= Moderately disagree 4 = Strongly disagree 5= Don't know  |  |  |
| 321 | Implementation of sanitation marketing approach increase access to improved latrine | 1= Strongly agree 2= Moderately agree<br>3 = Moderately disagree 4 = Strongly disagree 5= Don't know |  |  |
| 322 | It is too expensive to make latrine upgrades                                        | 1= Strongly agree 2= Moderately agree<br>3 = Moderately disagree 4 = Strongly disagree 5= Don't know |  |  |
| 323 | Improved latrine is important for preventing contamination of water bodies?         | 1= Strongly agree 2= Moderately agree<br>3 = Moderately disagree 4 = Strongly disagree 5= Don't know |  |  |
| 324 | Child mortality is reduced by construction of improved latrine                      | 1= Strongly agree 2= Moderately agree<br>3 = Moderately disagree 4 = Strongly disagree 5= Don't know |  |  |

|                                              |                                                                                                                                         |                                                                                                                                                                                                                       |  |  |
|----------------------------------------------|-----------------------------------------------------------------------------------------------------------------------------------------|-----------------------------------------------------------------------------------------------------------------------------------------------------------------------------------------------------------------------|--|--|
| 325                                          | Availability of improved latrine prevents the people to practice open defecation                                                        | 1= Strongly agree 2= Moderately agree<br>3 = Moderately disagree 4 = Strongly disagree 5= Don't know                                                                                                                  |  |  |
| 326                                          | Thinking about the soil condition and landscape surrounding your household, how easy do you believe it would be to construct a latrine? | 1=Not at all easy 2=Somewhat easy<br>3=Moderatelyeasy4=Very easy<br>5= Extremely easy                                                                                                                                 |  |  |
| 327                                          | Having my own latrine will bring comfort to me and my family                                                                            | 1= Strongly agree 2= Moderately agree<br>3 = Moderately disagree 4 = Strongly disagree 5= Don't know                                                                                                                  |  |  |
| 328                                          | Households that own latrines are seen as better educated                                                                                | 1= Strongly agree 2= Moderately agree<br>3 = Moderately disagree 4 = Strongly disagree 5= Don't know                                                                                                                  |  |  |
| 329                                          | People who share latrines are more at risk of getting diarrhea                                                                          | 1= Strongly agree 2= Moderately agree<br>3 = Moderately disagree 4 = Strongly disagree 5= Don't know                                                                                                                  |  |  |
| <b>Availability of Improved latrine(400)</b> |                                                                                                                                         |                                                                                                                                                                                                                       |  |  |
| 401                                          | What kind of latrine do you have?                                                                                                       | 1= Flush to piped sewer system<br>2= Flush to septic tank3= Flush to pit latrine 4= Flush to somewhere else<br><br>5= Ventilated improved pit latrine<br>6= Pit latrine with slab<br>7= Pit latrine without slab/open |  |  |

|     |                                                                                                      |                                                                                                   |  |  |
|-----|------------------------------------------------------------------------------------------------------|---------------------------------------------------------------------------------------------------|--|--|
|     |                                                                                                      | pit<br>9= if other specify -----                                                                  |  |  |
| 402 | Do you share toilet facility with other household?                                                   | 0 = No                      1 = Yes                                                               |  |  |
| 403 | How many years since latrine constructed?                                                            | 1= Less than 1 year 2= 1-2 years<br><br>3= 2-3 years 4= Greater than 3 years                      |  |  |
| 404 | Does the latrine have a lid/cover?                                                                   | 0 = No                      1 = Yes                                                               |  |  |
| 405 | Is the latrine pan currently broken, choked or blocked due to debris, stone, leaves, mud, paper etc? | 0 = No                      1 = Yes                                                               |  |  |
| 406 | Does the latrine have a functioning light?                                                           | 0 = No                      1 = Yes                                                               |  |  |
| 407 | Does the latrine have a ventilation pipe to take out the odor from the pits?                         | 0 = No                      1 = Yes                                                               |  |  |
| 408 | Is there a hand washing facility?                                                                    | 0 = No                      1 = Yes                                                               |  |  |
| 409 | Is there water at the place for hand washing?                                                        | 0 = No                      1 = Yes                                                               |  |  |
| 410 | Is there presence of soap, detergent or other cleaning agent? (Multiple responses possible)          | 0 = No                      1 = Yes                                                               |  |  |
| 411 | Since the latrine was constructed, have you made any improvements to your facility?                  | 0 = No                      1 = Yes                                                               |  |  |
| 412 | What improvements have been made? (Multiple responses possible)                                      | 1= Changed floor to cement, ceramics, bricks 2=Put cover/lid<br>3=Build wall with bricks 4= Put a |  |  |

|     |                            |                                              |         |  |
|-----|----------------------------|----------------------------------------------|---------|--|
|     |                            | corrugated iron roof 9= if other, specify--- |         |  |
| 413 | Access of improved latrine | 0 = No                                       | 1 = Yes |  |

### Observational check list

|                                         |                                                                                         |               |         |  |
|-----------------------------------------|-----------------------------------------------------------------------------------------|---------------|---------|--|
| <b>Improve latrine measurement(500)</b> |                                                                                         |               |         |  |
| 501                                     | Does the floor of latrine have a hole other than a squat hole? (Checked by observation) | 0 = No<br>Yes | 1 =     |  |
| 502                                     | Does the floor of latrine can easily cleanable? (Checked by observation)                | 0 = No<br>Yes | 1 =     |  |
| 503                                     | Does the slab of latrine free from faeces? (Checked by observation)                     | 0 = No<br>Yes | 1 =     |  |
| 504                                     | Does the slab of latrine have a fly protected covered? (Checked by observation)         | 0 = No<br>Yes | 1 =     |  |
| 505                                     | Does the height of latrine is 1.75 and above meter? (Checked by observation)            | 0 = No<br>Yes | 1 =     |  |
| 506                                     | Does the roof of latrine protect rain and sunlight? (Checked by observation)            | 0 = No        | 1 = Yes |  |
| 507                                     | Does latrine have flood protection scale? (Checked by observation)                      | 0 = No        | 1 = Yes |  |
| 508                                     | Does latrine have hand washing facility? (Observation)                                  | 0 = No        | 1 = Yes |  |

|     |                                                                       |        |         |  |  |
|-----|-----------------------------------------------------------------------|--------|---------|--|--|
| 509 | Is there water in hand washing facility? (Checked by Observation)     | 0 = No | 1 = Yes |  |  |
| 510 | Is there soap near to hand washing facility? (Checked by Observation) | 0 = No | 1 = Yes |  |  |
| 511 | Does latrine have door? (Checked by observation)                      | 0 = No | 1 = Yes |  |  |
